# Supplementary material for: Preparation of high-yield N-doped biochar from nitrogen-containing phosphate and its effective adsorption for toluene
Source: Royal Society of Chemistry journal article supplement (doi:10.1039/c8ra05714a), 2018-01-01
Supplement: c8ra05714a1.pdf [file c8ra05714a1.pdf]

**Supporting information**

**Preparation of high-yield N-doped biochar from nitrogen-containing phosphate and its effective adsorption for toluene**

Qiying Zhou,<sup>†</sup> Xia Jiang,<sup>\*,†,‡</sup> Xi Li<sup>a,†</sup>, Charles Q. Jia,<sup>§</sup> and Wenju Jiang<sup>†,‡</sup>

<sup>†</sup> College of Architecture and Environment, Sichuan University, Chengdu 610065, China

<sup>‡</sup> National Engineering Research Center for Flue Gas Desulfurization, Chengdu 610065, China

<sup>§</sup> Department of Chemical Engineering & Applied Chemistry, University of Toronto, 200 College St., Toronto, Ontario M5S 3E5, Canada

\*Corresponding author: Xia Jiang

Tel.: +86 28 85467800; fax: +86 28 85405613.

E-mail address: xjiang@scu.edu.cn (X. Jiang)

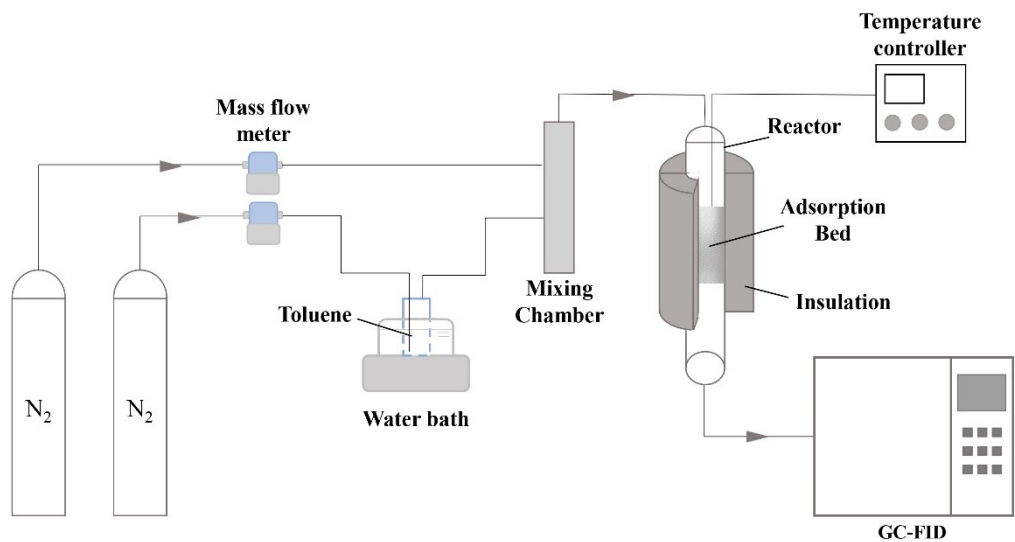

**Fig. S1.** Schematic of the fixed bed system for toluene adsorption

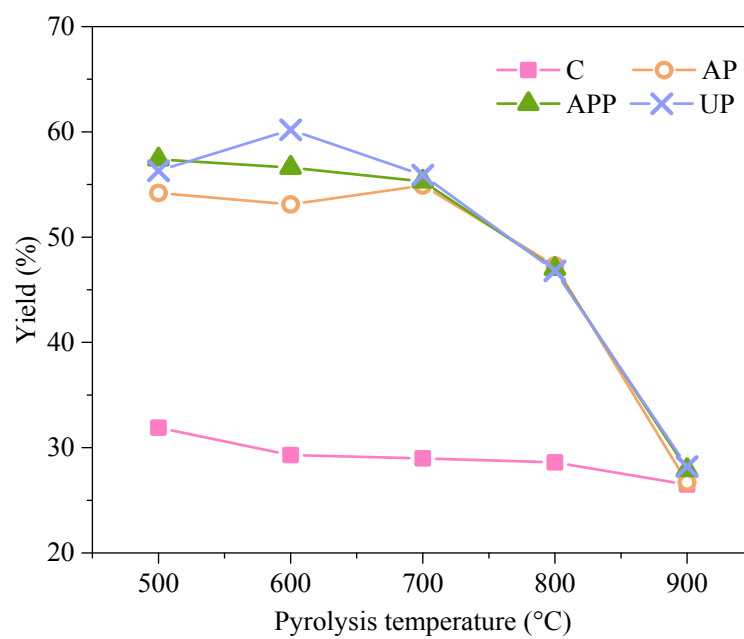

**Fig. S2.** The yields of prepared carbon with the addition of different nitrogen-containing phosphates

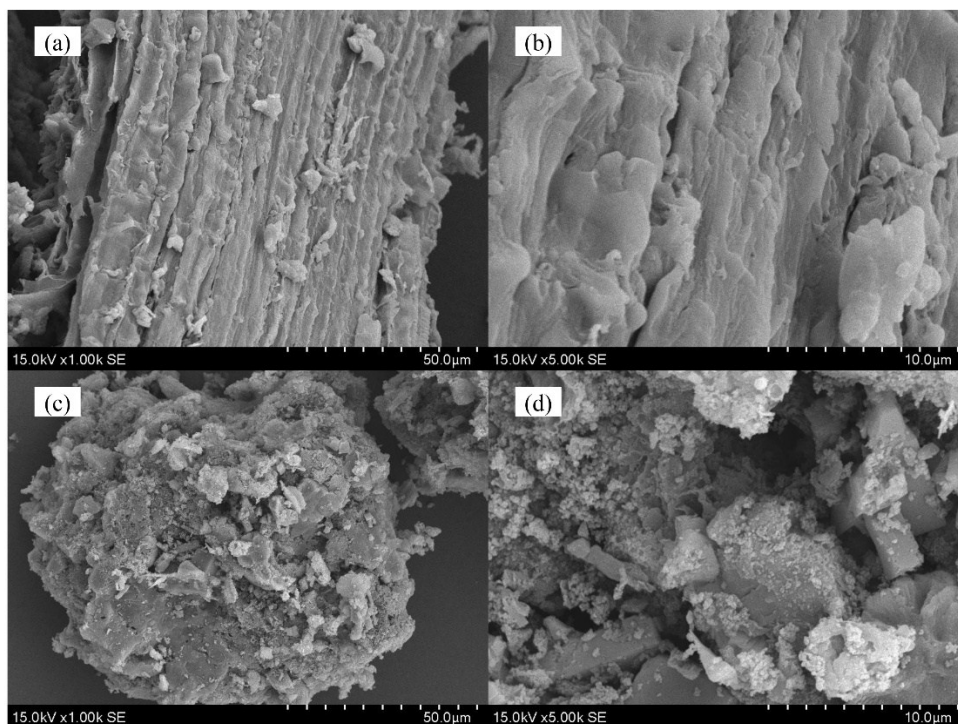

**Fig. S3.** SEM images of C-600 ((a) and (b)), and AP-600 ((c) and (d))

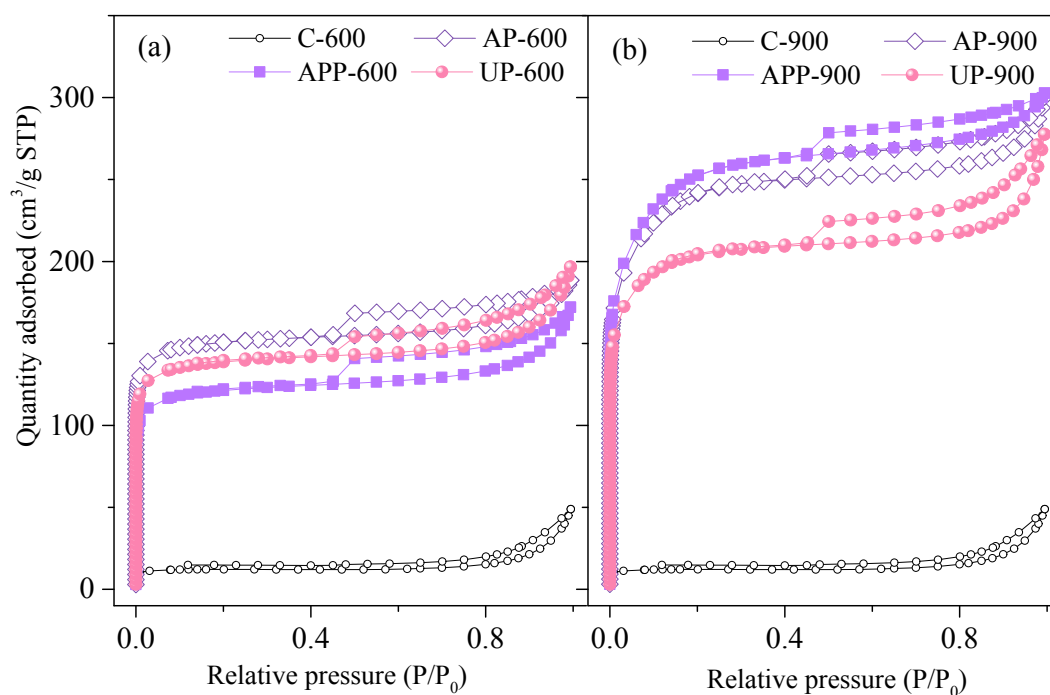

**Fig. S4.** Nitrogen adsorption-desorption isotherms of prepared carbon at 600 °C (a) and 900 °C (b)

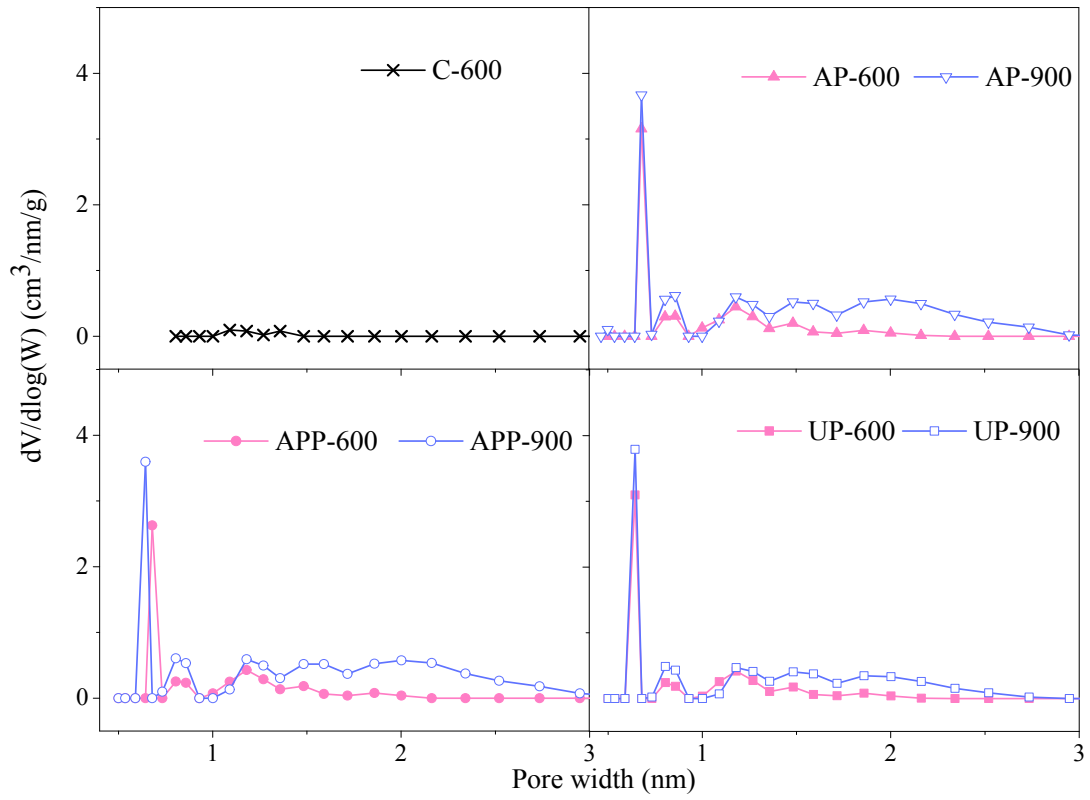

**Fig. S5.** Pore size distribution of the prepared carbon

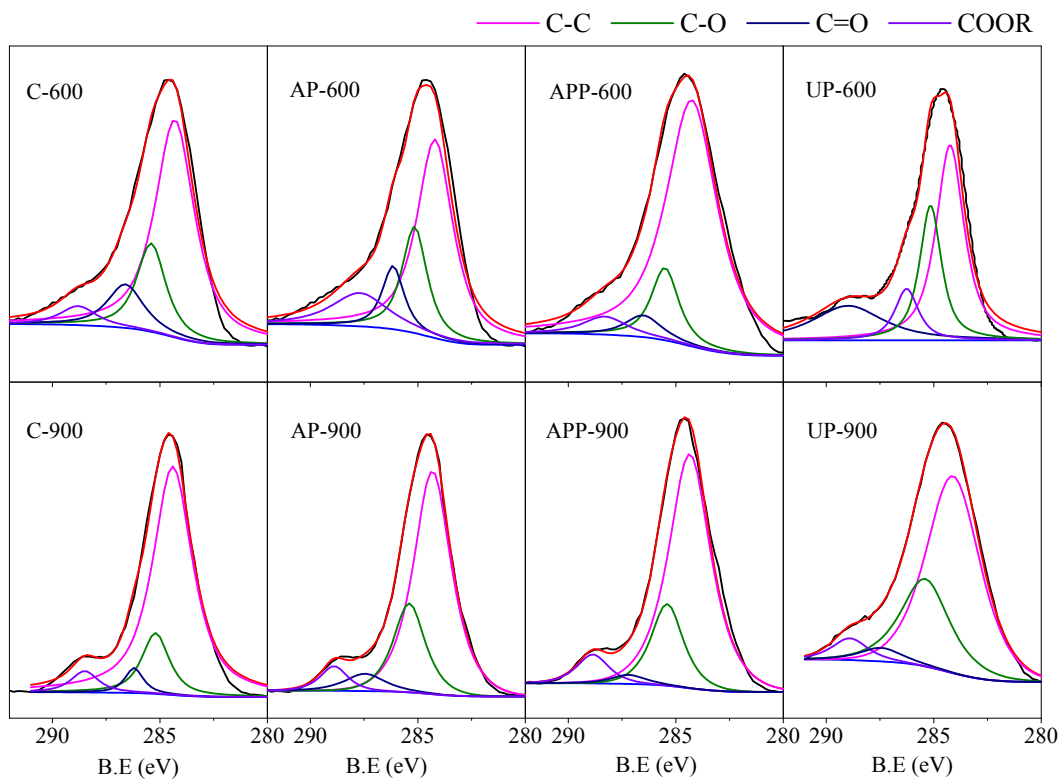

**Fig. S6.** High resolution XPS spectra for C 1s of the prepared carbon

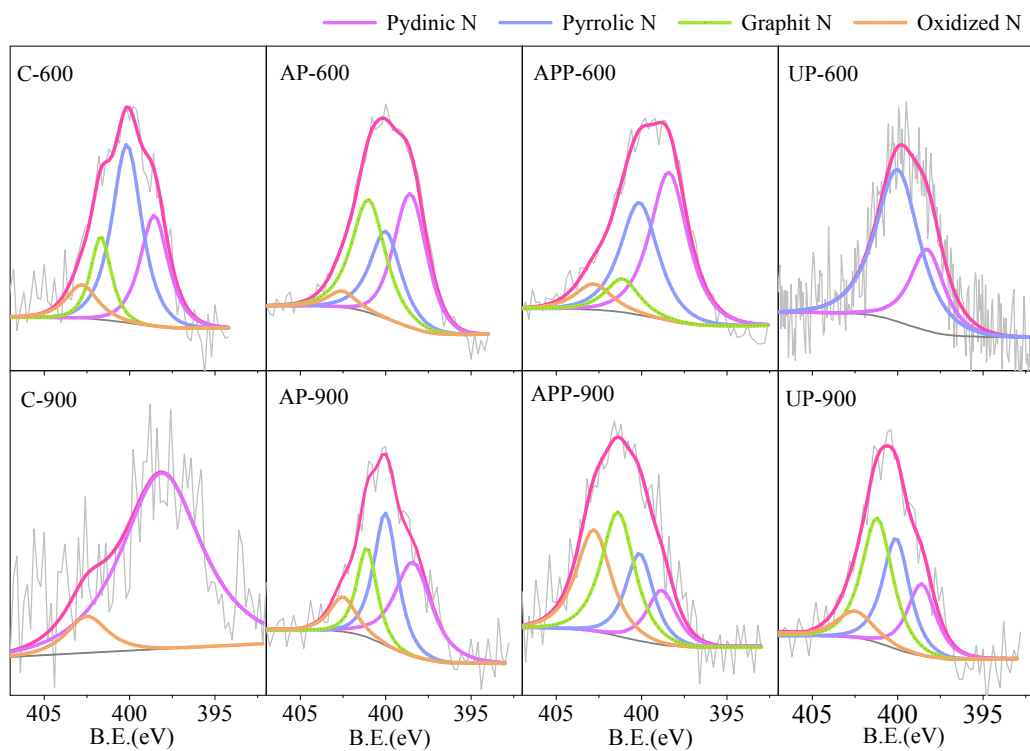

**Fig. S7.** High resolution XPS spectra for N 1s of prepared carbon

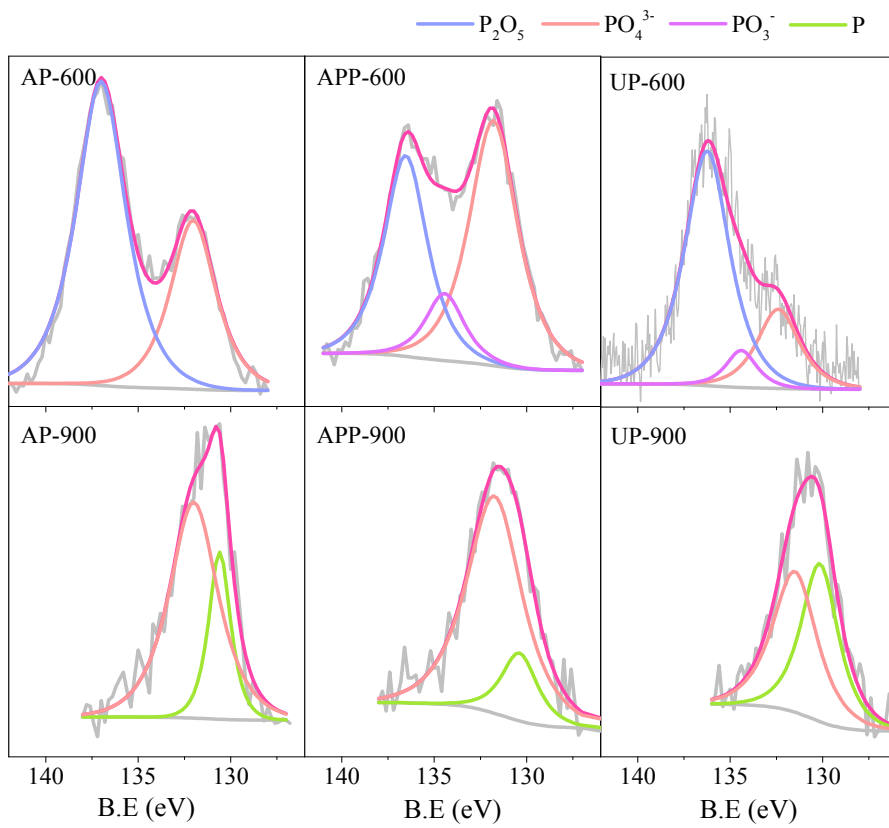

**Fig. S8.** High resolution XPS spectra for P 2p of prepared carbon

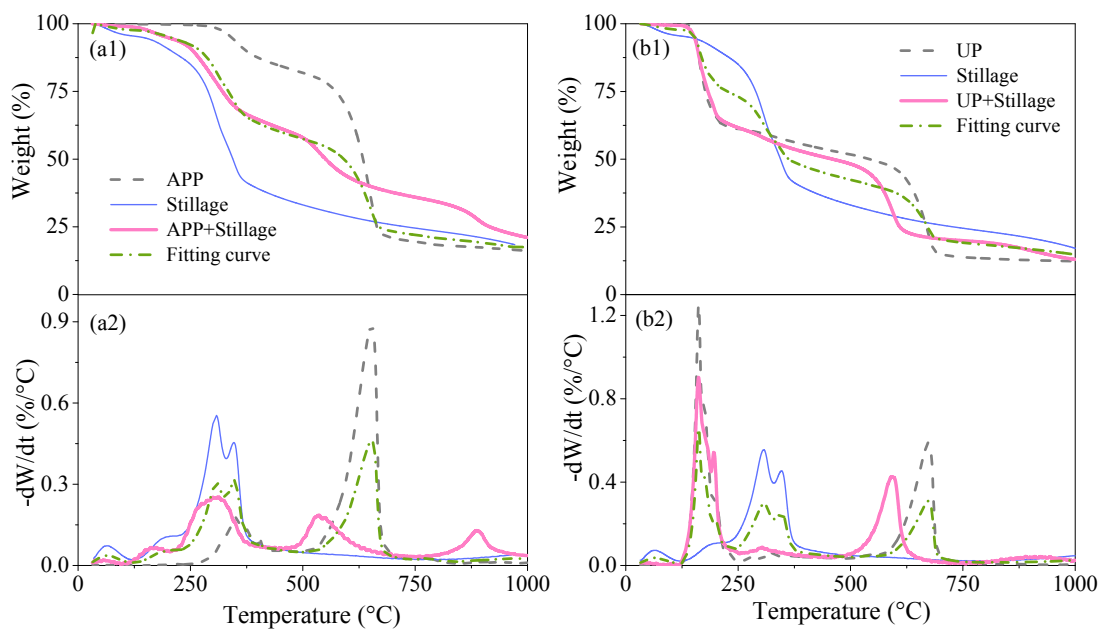

**Fig. S9.** TG analysis of pristine stillage, mixture of tillage and APP (a) and UP (b) (TG curve (1), DTG curve (2))

**Table S1** Characteristics of nitrogen-containing phosphates

| NC<br>P | Formula                                                | N (%) | P (%) | Structural formula                                                                   |
|---------|--------------------------------------------------------|-------|-------|--------------------------------------------------------------------------------------|
| AP      | $(\text{NH}_4)_3\text{PO}_4$                           | 28.1  | 20.8  | 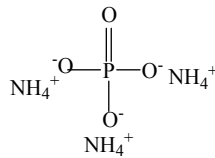   |
| APP     | $(\text{NH}_4)_{n+2}\text{P}_n\text{O}_{3n+1}$         | 17.0  | 31.0  |   |
| UP      | $\text{CO}(\text{NH}_2)_2 \cdot \text{H}_3\text{PO}_4$ | 17.7  | 19.5  |  |

**Table S2** Bulk density of the prepared carbon

| Sample  | Bulk density (g/cm <sup>3</sup> ) | Sample  | Bulk density (g/cm <sup>3</sup> ) |
|---------|-----------------------------------|---------|-----------------------------------|
| AP-600  | 0.48                              | AP-900  | 0.32                              |
| APP-600 | 0.36                              | APP-900 | 0.28                              |
| UP-600  | 0.56                              | UP-900  | 0.45                              |
